# Supplementary material for: Identification of the protonation site of gaseous triglycine: the cis-peptide bond conformation as the global minimum
Source: Royal Society of Chemistry journal article supplement (doi:10.1039/c7cp01997a), 2017-01-01
Supplement: c7cp01997a1.pdf [file c7cp01997a1.pdf]

## Electronic Supplementary Information for

### Identification of the protonation site of gaseous triglycine: the cis-peptide bond conformation as the global minimum

Hongbao Li,<sup>\*a</sup> Jun Jiang<sup>\*a</sup> and Yi Luo<sup>a, b</sup>

<sup>a</sup> Hefei National Laboratory for Physical Sciences at the Microscale, School of Chemistry and Materials Science, University of Science and Technology of China, Hefei, Anhui, 230026, China

<sup>b</sup> Department of Theoretical Chemistry and Biology, School of Biotechnology, Royal Institute of Technology, S-106 91 Stockholm, Sweden.

\*Correspondence to: lihb@mail.ustc.edu.cn, Jiangj1@ustc.edu.cn.

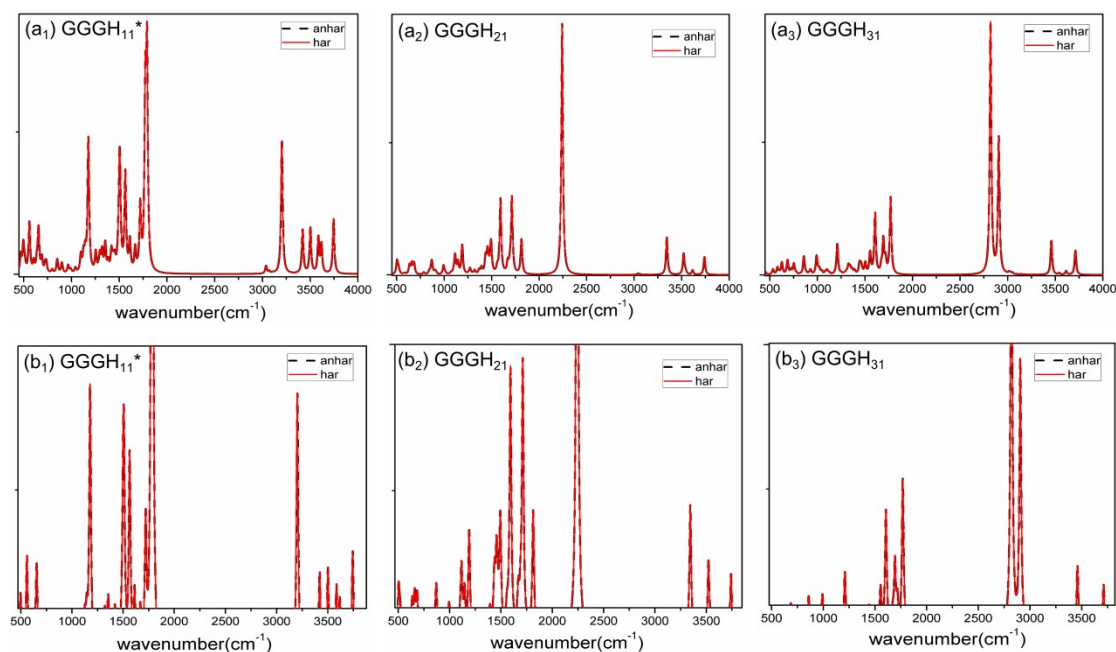

**Fig. S1** Comparison of the theoretical IR spectra of the most stable conformer of each isomer of protonated triglycine ( $a_1$ ) GGGH $_{11}^*$ , ( $a_2$ ) GGGH $_{21}$ , ( $a_3$ ) GGGH $_{31}$  and the corresponding enlarged small peaks ( $b_1$ - $b_3$ ) at 298 K, simulated by anharmonic (anhar) and unscaled harmonic (har) frequency calculations at the B3LYP/6-311++G(d, p) level of theory. A Lorentzian profile with a FWHM of 20  $\text{cm}^{-1}$  is used to convolute the calculated spectra.

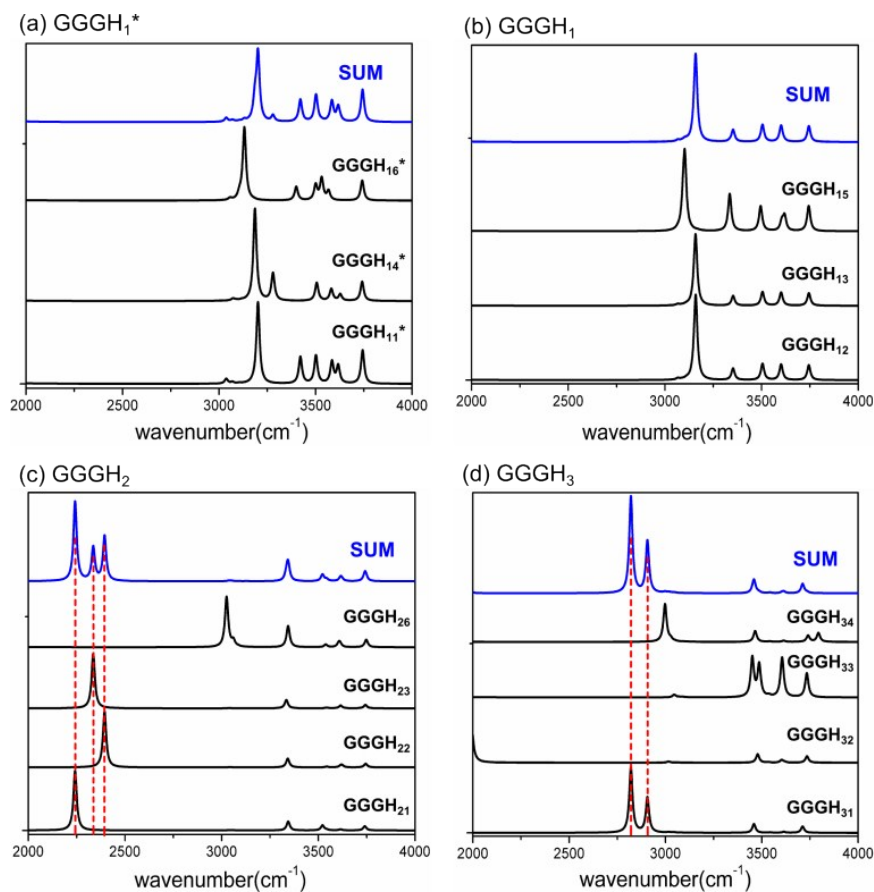

**Fig. S2** Simulated IR spectra (2000-4000  $\text{cm}^{-1}$  region) of dominant conformers in the four isomers of protonated triglycine (a)  $\text{GGGH}_1^*$ , (b)  $\text{GGGH}_1$ , (c)  $\text{GGGH}_2$ , (d)  $\text{GGGH}_3$  at 298 K, calculated at the B3LYP/6-311++G(d, p) level of theory, as well as their summations (SUM) calculated using the percentage abundances listed in Table 3. A Lorentzian profile with a FWHM of  $20 \text{ cm}^{-1}$  is used to convolute the calculated spectra.

**Table S1.** Conformers with low Gibbs free energy of protonated triglycine, together with their respective percent abundances at 498, 298, 250 and 198 K. The abundances were calculated using CCSD/6-31++G (d, p) electronic energies and Gibbs free energy corrections at the B3LYP/6-311++G (d, p) level of theory.

|              | <b>GGGH<sub>11</sub>*</b> | <b>GGGH<sub>12</sub></b> | <b>GGGH<sub>13</sub></b> | <b>GGGH<sub>14</sub>*</b> | <b>GGGH<sub>15</sub></b> | <b>GGGH<sub>21</sub></b> | <b>GGGH<sub>22</sub></b> | <b>GGGH<sub>23</sub></b> |
|--------------|---------------------------|--------------------------|--------------------------|---------------------------|--------------------------|--------------------------|--------------------------|--------------------------|
| <b>498 K</b> | 25.60%                    | 12.65%                   | 12.53%                   | 13.00%                    | -                        | 10.01%                   | 9.04%                    | 7.73%                    |
| <b>298 K</b> | 60.44%                    | 11.11%                   | 10.95%                   | 8.89%                     | 0.60%                    | 3.99%                    | 2.38%                    | 1.65%                    |
| <b>250 K</b> | 73.45%                    | 8.37%                    | 8.23%                    | 5.98%                     | 0.30%                    | 2.04%                    | 1.01%                    | 0.63%                    |
| <b>198 K</b> | -                         | 45.52%                   | 44.56%                   | -                         | 0.84%                    | 5.81%                    | 2.11%                    | 1.13%                    |
